# Supplementary material for: Tracking the dimensional conversion process of semiconducting lead bromide perovskites by mass spectroscopy, powder X-ray diffraction, microcalorimetry and crystallography
Source: Royal Society of Chemistry journal article supplement (doi:10.1039/c9dt02068c), 2019-01-01
Supplement: c9dt02068c1.pdf [file c9dt02068c1.pdf]

# Tracking the Dimensional Conversion Process of Semiconducting Lead Bromide Perovskites by Mass Spectroscopy, Powder X-ray Diffraction, Microcalorimetry and Crystallography

*Yue-Qiao Hu,<sup>a</sup> Hong-Yan Hui,<sup>a</sup> Hong-Qiang Wen,<sup>a</sup> Yanyan Wang,<sup>b</sup> Wei-Quan Lin,<sup>c</sup>  
De-Suo Yang,<sup>a,\*</sup> Guo-Dong Feng<sup>a,d,\*</sup>*

<sup>a</sup> Key Laboratory of Advanced Molecular Engineering Materials, College of Chemistry and Chemical Engineering, Baoji University of Arts and Sciences, Baoji 721013, China.

<sup>b</sup> Key Laboratory of Applied Surface and Colloid Chemistry, MOE, School of Chemistry and Chemical Engineering, Shaanxi Normal University, Xi'an 710062, China.

<sup>c</sup> School of Chemistry and Chemical Engineering, Guangzhou University, Guangzhou Higher Education Mega Center, No. 230 Wai Huan Xi Road, Guangzhou 510006, China.

<sup>d</sup> State Key Laboratory of Inorganic Synthesis and Preparative Chemistry, College of Chemistry, Jilin University, 2699 Qianjin Street, Changchun, 130012, China.

**Table S1** Summary of crystal data and structural refinements for **1** and **2**.

|                                                                             | <b>1</b>                                                                        | <b>2</b>                                                                       |
|-----------------------------------------------------------------------------|---------------------------------------------------------------------------------|--------------------------------------------------------------------------------|
| formula                                                                     | C <sub>4</sub> H <sub>16</sub> Br <sub>5</sub> N <sub>2</sub> OPbS <sub>2</sub> | C <sub>4</sub> H <sub>14</sub> Br <sub>4</sub> N <sub>2</sub> PbS <sub>2</sub> |
| formula weight                                                              | 779.05                                                                          | 681.12                                                                         |
| crystal system                                                              | Monoclinic                                                                      | Monoclinic                                                                     |
| space group                                                                 | <i>P</i> 2 <sub>1</sub>                                                         | <i>C</i> 2/ <i>c</i>                                                           |
| <i>T</i> (K)                                                                | 100(2) K                                                                        | 100(2) K                                                                       |
| <i>a</i> (Å)                                                                | 10.0824(3)                                                                      | 11.3898(3)                                                                     |
| <i>b</i> (Å)                                                                | 8.3838(2)                                                                       | 11.6104(3)                                                                     |
| <i>c</i> (Å)                                                                | 10.9546(4)                                                                      | 22.8884(6)                                                                     |
| <i>α</i> (deg)                                                              | 90                                                                              | 90                                                                             |
| <i>β</i> (deg)                                                              | 104.184(4)                                                                      | 90.983(2)                                                                      |
| <i>γ</i> (deg)                                                              | 90                                                                              | 90                                                                             |
| <i>V</i> (Å <sup>3</sup> )                                                  | 913.81(17)                                                                      | 3026.32(14)                                                                    |
| <i>D<sub>c</sub></i> (g cm <sup>-3</sup> )                                  | 2.882                                                                           | 2.990                                                                          |
| <i>F</i> (000)                                                              | 702                                                                             | 2448                                                                           |
| <i>Z</i>                                                                    | 2                                                                               | 8                                                                              |
| <i>μ</i> (mm <sup>-1</sup> )                                                | 20.739                                                                          | 21.956                                                                         |
| Flack                                                                       | -0.022(7)                                                                       | /                                                                              |
| reflns collected                                                            | 9646                                                                            | 12759                                                                          |
| unique reflns                                                               | 3953                                                                            | 3766                                                                           |
| <i>R<sub>int</sub></i>                                                      | 0.051                                                                           | 0.026                                                                          |
| data/parameters                                                             | 3953/141                                                                        | 3766/121                                                                       |
| GOF                                                                         | 0.994                                                                           | 1.028                                                                          |
| <i>R</i> <sub>1</sub> , <i>wR</i> <sub>2</sub> [ <i>I</i> > 2σ( <i>I</i> )] | 0.0254, 0.0461                                                                  | 0.0209, 0.0430                                                                 |
| <i>R</i> <sub>1</sub> , <i>wR</i> <sub>2</sub> (all data)                   | 0.0298, 0.0471                                                                  | 0.0261, 0.0442                                                                 |

**Table S2** Selected bond lengths (Å) and angles (°) for **1** and **2**.

| <b>1</b>                                  |            | <b>2</b>                                                                              |            |
|-------------------------------------------|------------|---------------------------------------------------------------------------------------|------------|
| Pb(1)-Br(1)                               | 2.8914(7)  | Pb(1)-Br(2)                                                                           | 2.949(3)   |
| Pb(1)-Br(4)                               | 2.9468(8)  | Pb(1)-Br(3)                                                                           | 2.956(2)   |
| Pb(1)-Br(5)                               | 2.9850(8)  | Pb(1)-Br(1) <sup>a</sup>                                                              | 3.012(3)   |
| Pb(1)-Br(2)                               | 3.0735(10) | Pb(1)-Br(5)                                                                           | 3.044(2)   |
| Pb(1)-Br(2) <sup>a</sup>                  | 3.0901(9)  | Pb(1)-Br(1)                                                                           | 3.065(3)   |
| Pb(1)-Br(3)                               | 3.1151(7)  | Pb(1)-Br(4)                                                                           | 3.177(3)   |
| Br(1)-Pb(1)-Br(4)                         | 83.86(2)   | Br(1)-Pb(1) <sup>b</sup>                                                              | 3.012(3)   |
| Br(1)-Pb(1)-Br(5)                         | 91.06(2)   | Br(5)-Pb(1) <sup>c</sup>                                                              | 3.044(2)   |
| Br(4)-Pb(1)-Br(5)                         | 88.49(2)   | Br(3)-Pb(1) <sup>d</sup>                                                              | 2.956(2)   |
| Br(1)-Pb(1)-Br(2)                         | 85.75(3)   | Br(2)-Pb(1)-Br(3)                                                                     | 91.12(5)   |
| Br(4)-Pb(1)-Br(2)                         | 96.15(3)   | Br(2)-Pb(1)-Br(1) <sup>a</sup>                                                        | 87.85(7)   |
| Br(5)-Pb(1)-Br(2)                         | 174.05(3)  | Br(3)-Pb(1)-Br(1) <sup>a</sup>                                                        | 87.98(10)  |
| Br(1)-Pb(1)-Br(2) <sup>a</sup>            | 96.64(3)   | Br(2)-Pb(1)-Br(5)                                                                     | 85.71(5)   |
| Br(4)-Pb(1)-Br(2) <sup>a</sup>            | 176.85(3)  | Br(3)-Pb(1)-Br(5)                                                                     | 173.14(10) |
| Br(5)-Pb(1)-Br(2) <sup>a</sup>            | 88.40(3)   | Br(1) <sup>a</sup> -Pb(1)-Br(5)                                                       | 85.82(9)   |
| Br(2)-Pb(1)-Br(2) <sup>a</sup>            | 86.991(10) | Br(2)-Pb(1)-Br(1)                                                                     | 89.06(7)   |
| Br(1)-Pb(1)-Br(3)                         | 170.69(3)  | Br(3)-Pb(1)-Br(1)                                                                     | 95.46(10)  |
| Br(4)-Pb(1)-Br(3)                         | 88.76(3)   | Br(1) <sup>a</sup> -Pb(1)-Br(1)                                                       | 175.42(3)  |
| Br(5)-Pb(1)-Br(3)                         | 94.42(3)   | Br(5)-Pb(1)-Br(1)                                                                     | 90.57(9)   |
| Br(2)-Pb(1)-Br(3)                         | 89.42(3)   | Br(2)-Pb(1)-Br(4)                                                                     | 173.20(7)  |
| Br(2) <sup>a</sup> -Pb(1)-Br(3)           | 91.05(3)   | Br(3)-Pb(1)-Br(4)                                                                     | 90.17(5)   |
| Pb(1)-Br(2)-Pb(1) <sup>b</sup>            | 169.75(3)  | Br(1) <sup>a</sup> -Pb(1)-Br(4)                                                       | 85.52(7)   |
|                                           |            | Br(5)-Pb(1)-Br(4)                                                                     | 92.29(5)   |
|                                           |            | Br(1)-Pb(1)-Br(4)                                                                     | 97.46(7)   |
|                                           |            | Pb(1) <sup>b</sup> -Br(1)-Pb(1)                                                       | 151.33(10) |
|                                           |            | Pb(1) <sup>c</sup> -Br(5)-Pb(1)                                                       | 156.24(14) |
|                                           |            | Pb(1) <sup>d</sup> -Br(3)-Pb(1)                                                       | 143.88(16) |
| a = -x+1,y+1/2,-z+1; b = -x+1,y-1/2,-z+1. |            | a = -x+1/2,y+1/2,-z+1/2; b = -x+1/2,y-1/2,-z+1/2; c = -x+1,y,-z+1/2; d = -x,y,-z+1/2. |            |

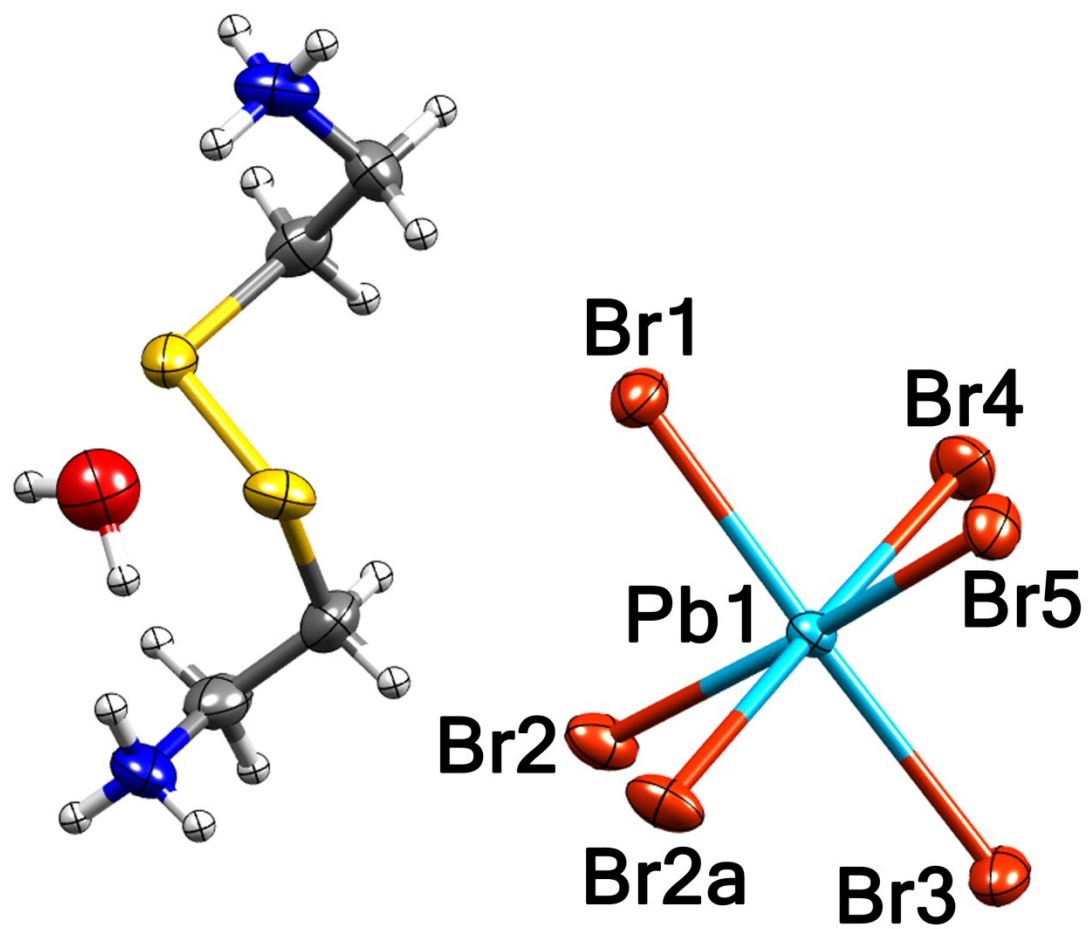

**Figure S1.** The asymmetric unit of **1**.

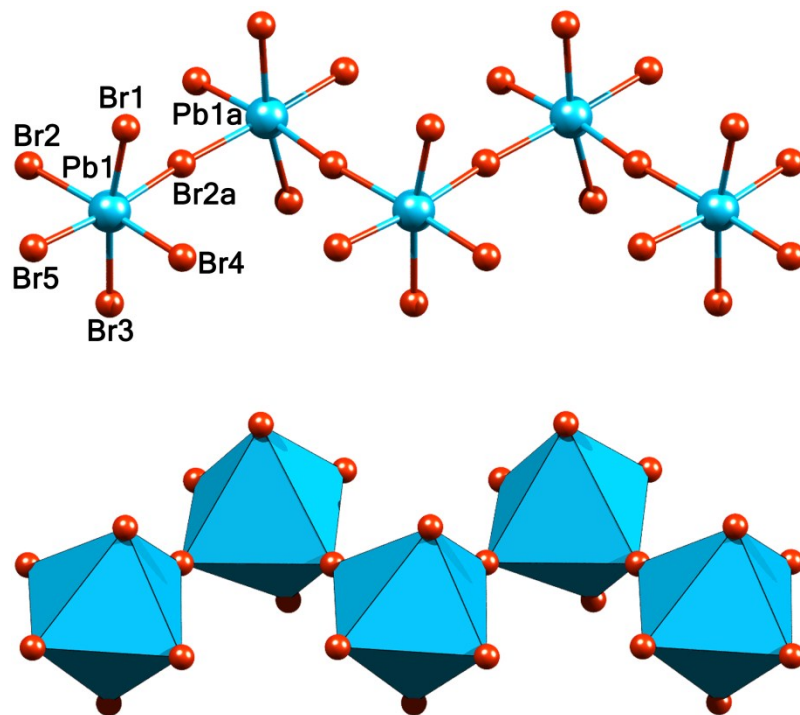

**Figure S2.** The 1D chain in **1**.

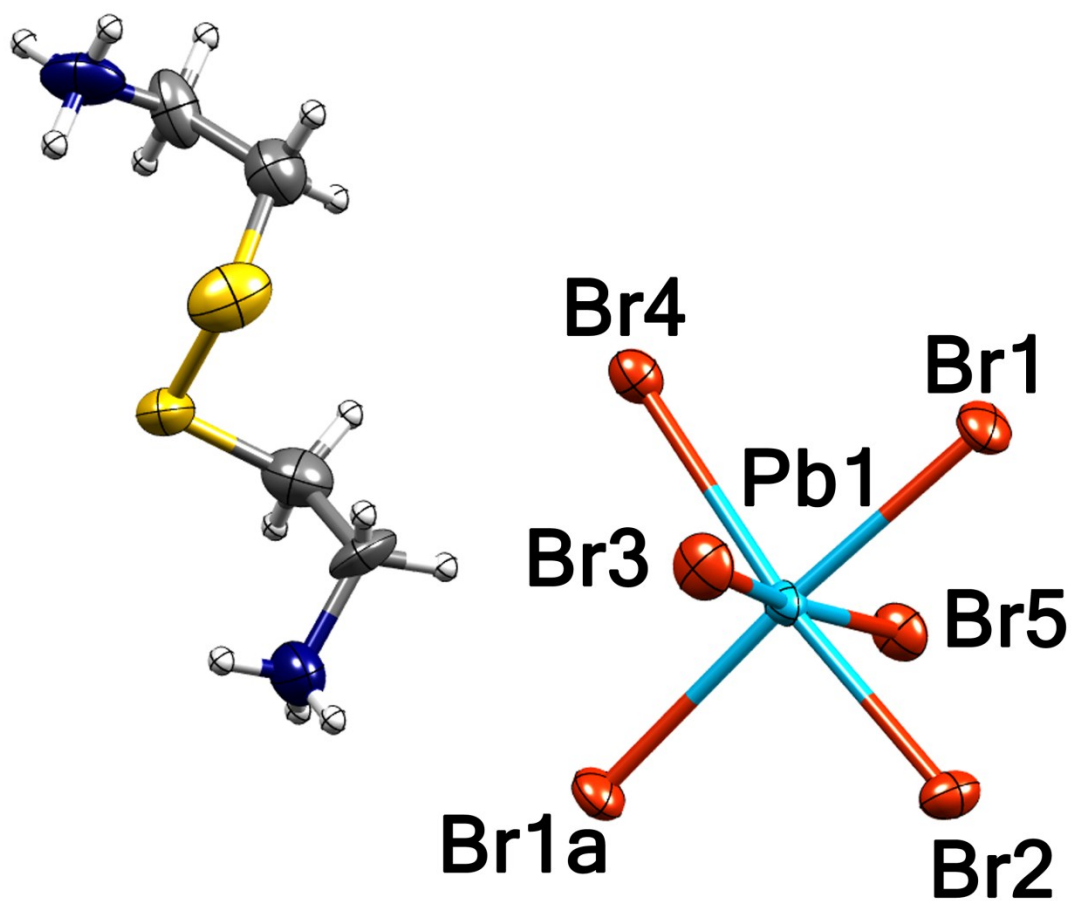

**Figure S3.** The asymmetric unit of **2**.

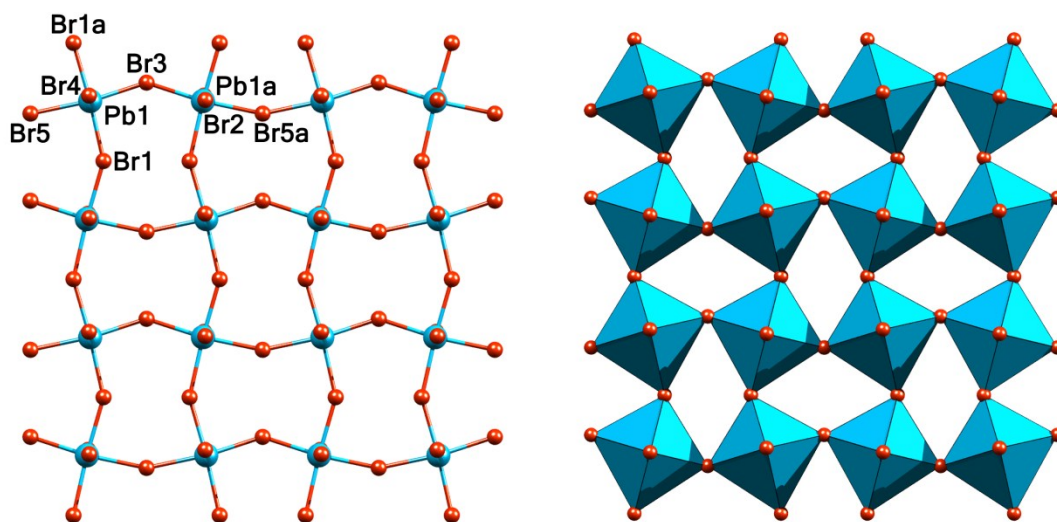

**Figure S4.** The 2D layer in **2**.

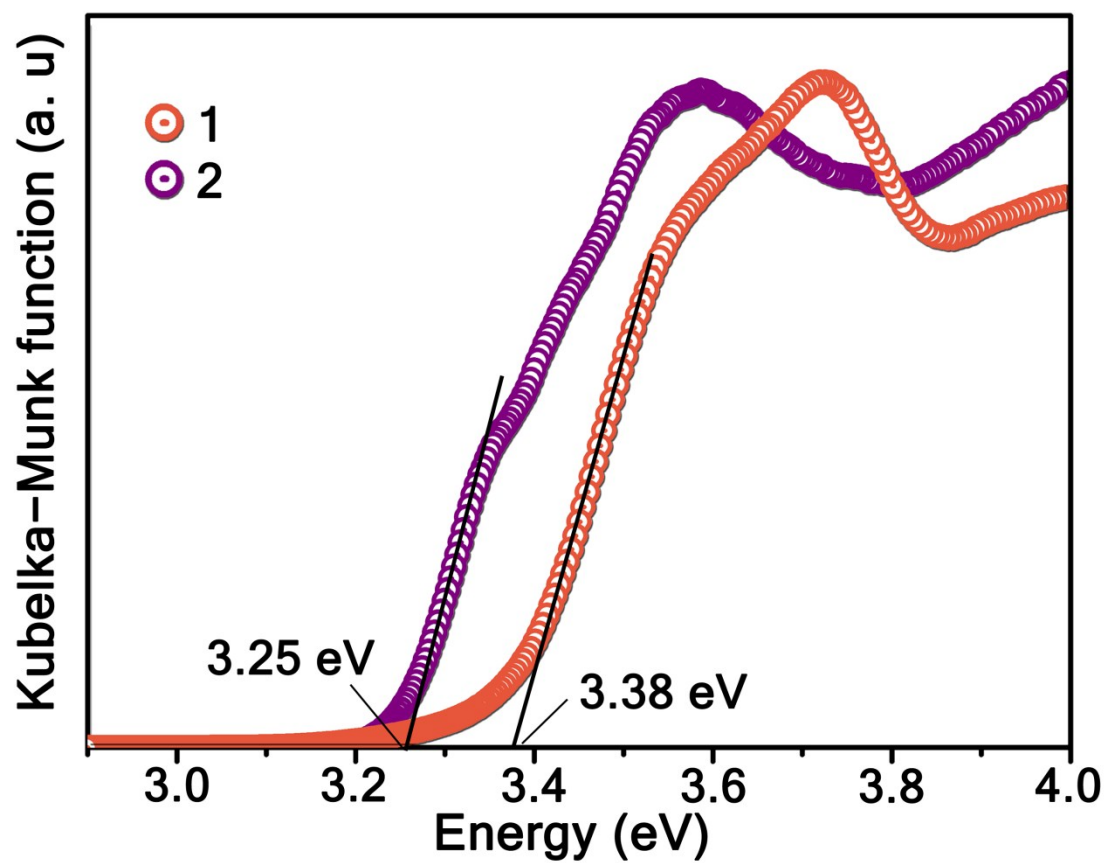

Figure S5. Optical absorption spectra of complexes 1 and 2.



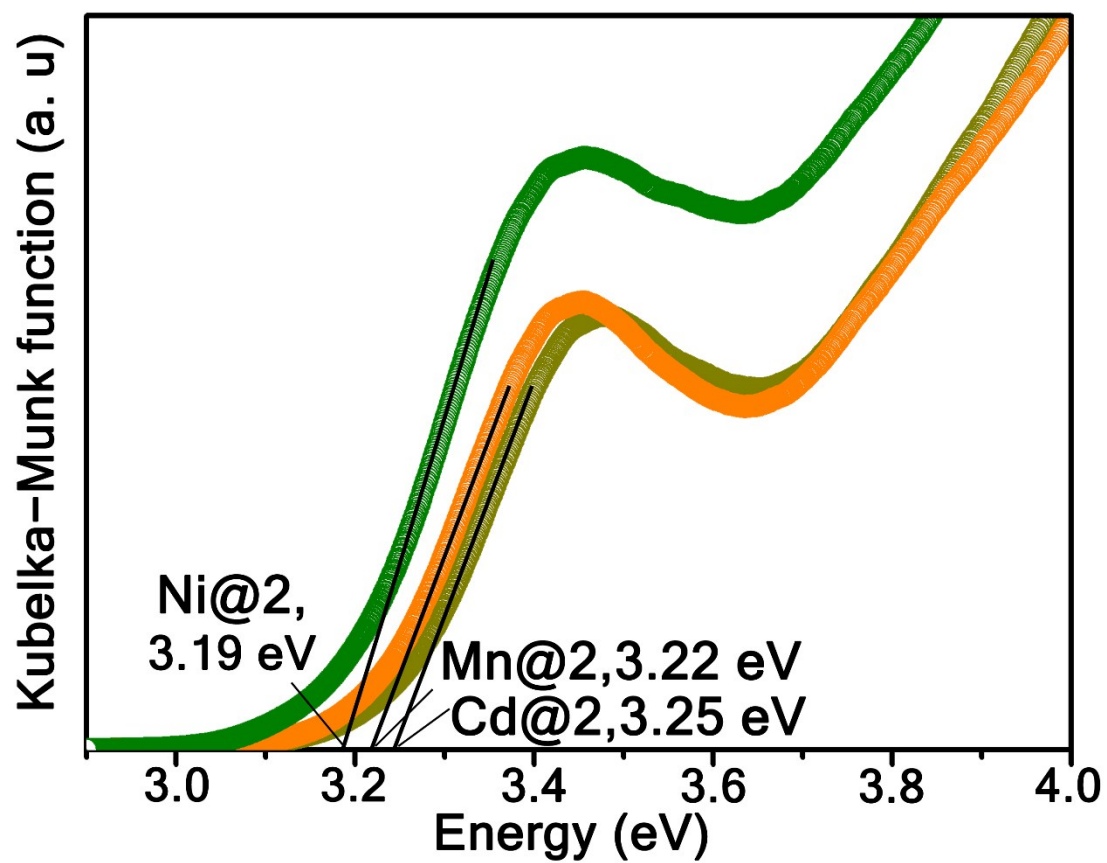

Figure S6. Optical absorption spectra of complexes Ni@2, Cd@2 and Mn@2.

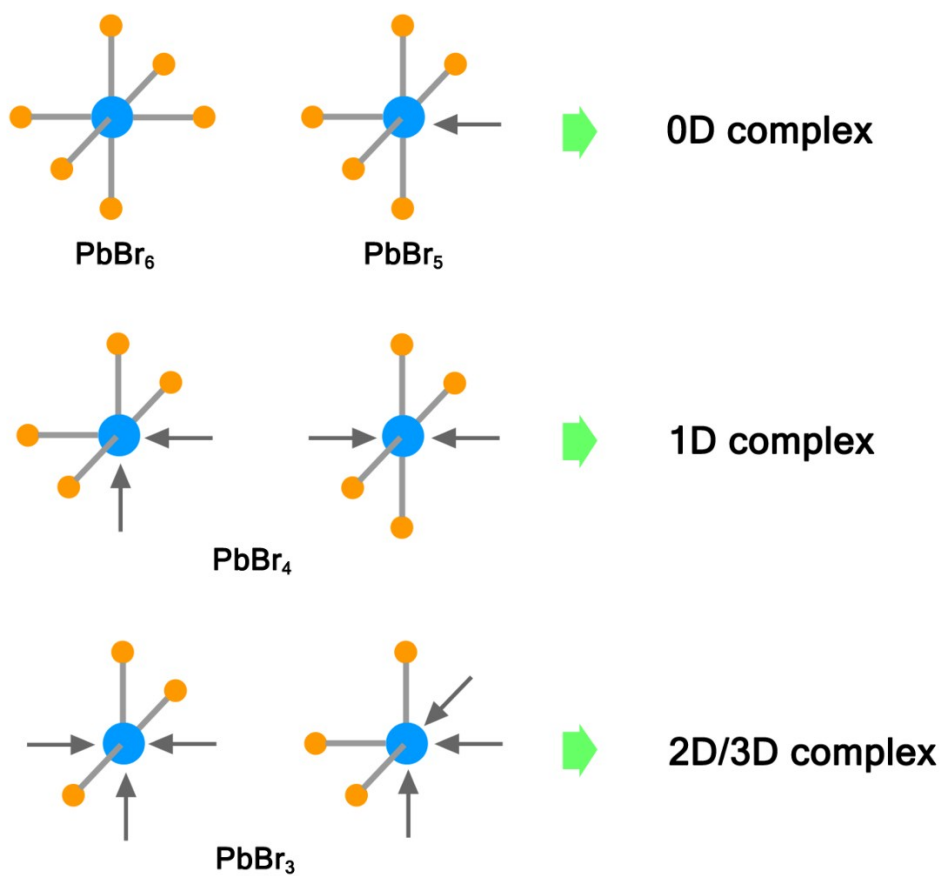

**Fig. S7** Relation between the configuration of intermediate and dimension of products.

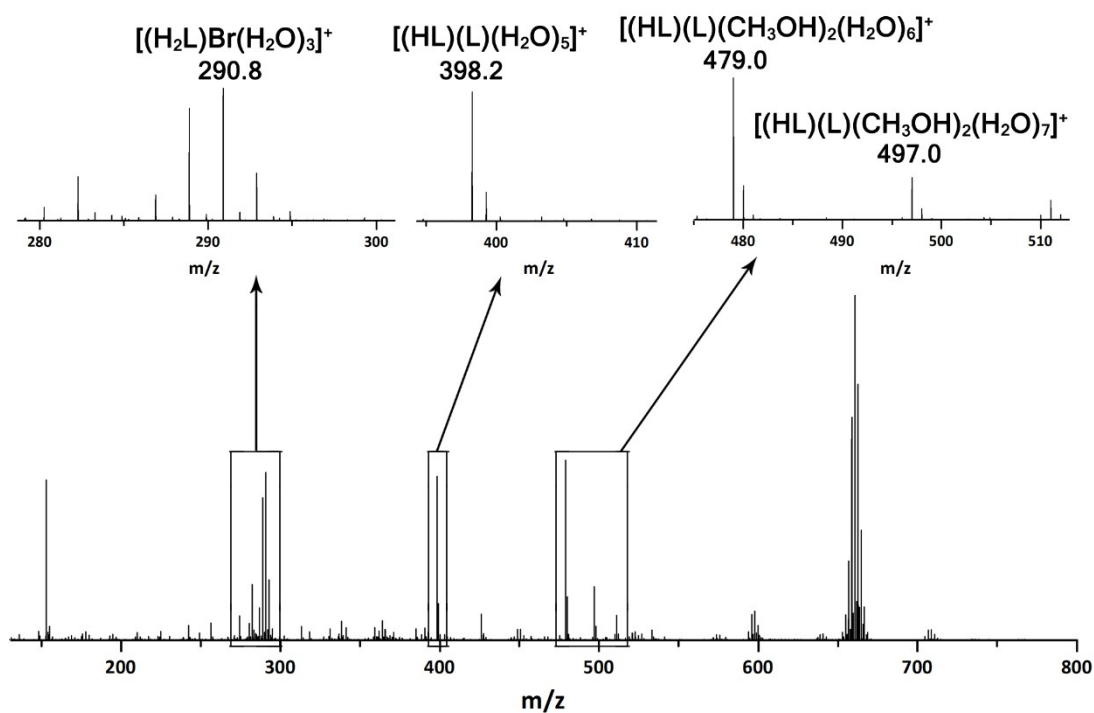

**Fig S8.** Positive-mode ESI-MS of the reaction solution 40 seconds of reaction. (L = H<sub>2</sub>NCH<sub>2</sub>CH<sub>2</sub>SSCH<sub>2</sub>CH<sub>2</sub>NH<sub>2</sub>).

**Table S3** Fair evaluation of the MS spectra.

| m/z   | Fragments                                                                                                                                                                              | Fitting data |
|-------|----------------------------------------------------------------------------------------------------------------------------------------------------------------------------------------|--------------|
| 153.1 | {H[NH <sub>2</sub> (CH <sub>2</sub> ) <sub>2</sub> SS(CH <sub>2</sub> ) <sub>2</sub> NH <sub>2</sub> ]} <sup>+</sup>                                                                   | 153.05       |
| 600.8 | {H <sub>2</sub> [NH <sub>2</sub> (CH <sub>2</sub> ) <sub>2</sub> SS(CH <sub>2</sub> ) <sub>2</sub> NH <sub>2</sub> ]PbBr <sub>3</sub> } <sup>+</sup>                                   | 600.79       |
| 660.7 | {H <sub>2</sub> [NH <sub>2</sub> (CH <sub>2</sub> ) <sub>2</sub> SS(CH <sub>2</sub> ) <sub>2</sub> NH <sub>2</sub> ]PbBr <sub>3</sub> (CH <sub>3</sub> OH) <sub>2</sub> } <sup>+</sup> | 664.82       |
| 708.7 | {H <sub>2</sub> [NH <sub>2</sub> (CH <sub>2</sub> ) <sub>2</sub> SS(CH <sub>2</sub> ) <sub>2</sub> NH <sub>2</sub> ]PbBr <sub>3</sub> (H <sub>2</sub> O) <sub>6</sub> } <sup>+</sup>   | 708.84       |
| 449.8 | {H <sub>2</sub> [NH <sub>2</sub> (CH <sub>2</sub> ) <sub>2</sub> SS(CH <sub>2</sub> ) <sub>2</sub> NH <sub>2</sub> ]MnBr <sub>3</sub> } <sup>+</sup>                                   | 447.73       |
| 450.8 | {H <sub>2</sub> [NH <sub>2</sub> (CH <sub>2</sub> ) <sub>2</sub> SS(CH <sub>2</sub> ) <sub>2</sub> NH <sub>2</sub> ]NiBr <sub>3</sub> } <sup>+</sup>                                   | 450.73       |
| 508.8 | {H <sub>2</sub> [NH <sub>2</sub> (CH <sub>2</sub> ) <sub>2</sub> SS(CH <sub>2</sub> ) <sub>2</sub> NH <sub>2</sub> ]CdBr <sub>3</sub> } <sup>+</sup>                                   | 504.70       |
